# Supplementary material for: Ethnic differences in the association of SERPING1 with age-related macular degeneration and polypoidal choroidal vasculopathy
Source: PubMed Central journal article supplement (PMC4371106; doi:10.1038/srep09424), 2015-03-24
Supplement: srep09424-s1.pdf [file srep09424-s1.pdf]

## **Ethnic differences in the association of *SERPING1* with age-related macular degeneration and polypoidal choroidal vasculopathy**

Ke Liu,<sup>1,2</sup> Timothy Y.Y. Lai,<sup>1</sup> Li Ma,<sup>1</sup> Frank H.P. Lai,<sup>3</sup> Alvin L. Young,<sup>1,3</sup> Marten E. Brelen,<sup>1,3</sup> Pancy O.S. Tam,<sup>1</sup> Chi Pui Pang,<sup>1,3</sup> Li Jia Chen.<sup>1,3</sup>

<sup>1</sup>Department of Ophthalmology and Visual Sciences, the Chinese University of Hong Kong, Hong Kong, China; <sup>2</sup>Shenzhen Eye Hospital, Shenzhen, China. <sup>3</sup>Department of Ophthalmology and Visual Sciences, Prince of Wales Hospital, the Chinese University of Hong Kong, Hong Kong, China.

### **Correspondence:**

Dr Li Jia Chen

Department of Ophthalmology and Visual Sciences, The Chinese University of Hong Kong, Hong Kong Eye Hospital, 147K Argyle Street, Kowloon, Hong Kong.

Tel: +852 39435810; Fax: +852 27159490; E-mail: [lijia\\_chen@cuhk.edu.hk](mailto:lijia_chen@cuhk.edu.hk)

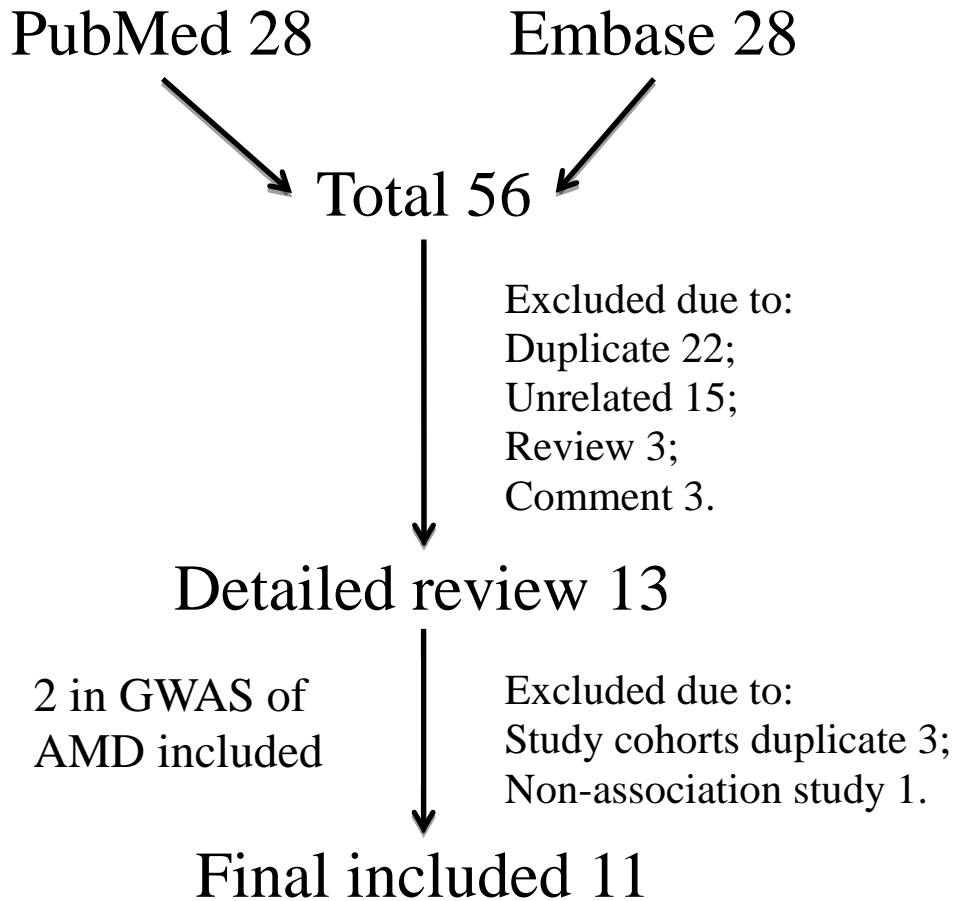

**Supplementary Fig S1.** Flow diagram of literature screening. The flow diagram showed the screening process of retrieved articles, including the number and reason of exclusion.

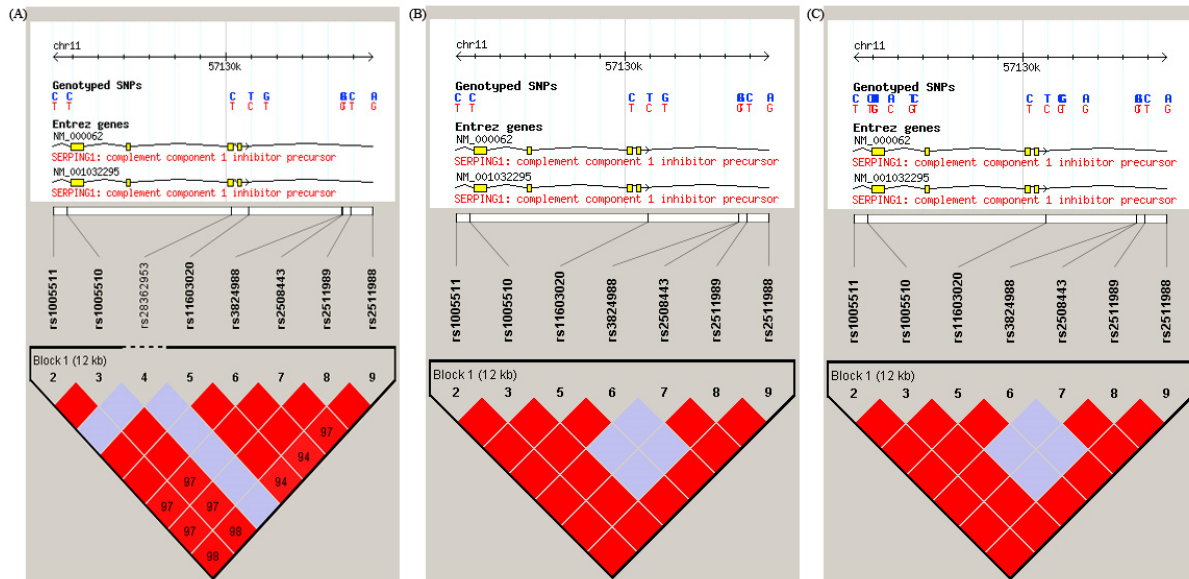

**Supplementary Fig S2. Linkage disequilibrium (LD) structures of *SERPING1* across the CEU (A), CHB (B) and JPT (C) HapMap populations.** The haplotype block was defined by the confidence interval method implemented in the Haploview software. The LD ( $r^2$ ) was listed in the cross cell between any two of SNPs. CEU: Utah residents with Northern and Western European ancestry from the CEPH collection; CHB: Han Chinese in Beijing, China; JPT: Japanese in Tokyo, Japan.
